# Supplementary material for: TGFBI modulates tumour hypoxia and promotes breast cancer metastasis
Source: PubMed Central journal article supplement (PMC7718944; doi:10.1002/1878-0261.12828), 2020-11-05
Supplement: MOL2-14-3198-s001.pdf [file MOL2-14-3198-s001.pdf]

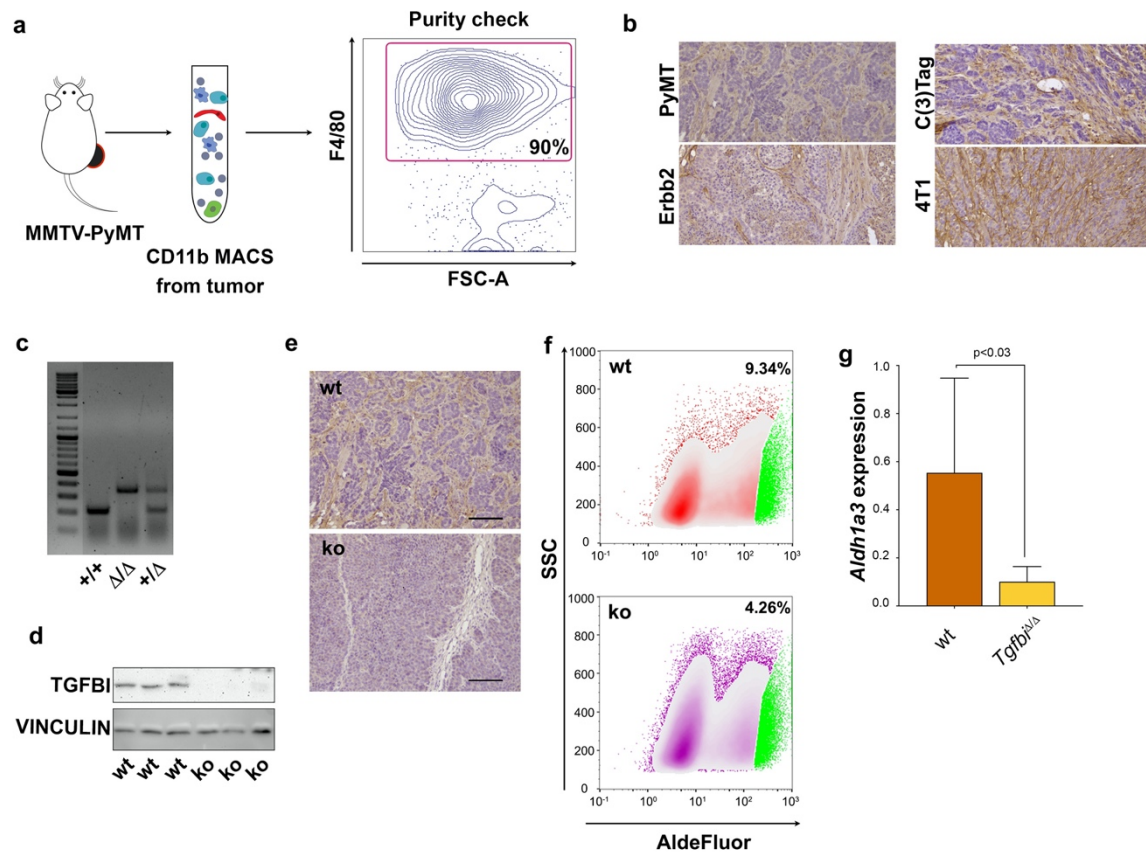

## Supplemental File 1

**Supplemental File 1:** (a) CD11b<sup>+</sup> cells from fresh MMTV-PyMT tumours were sorted by MACS and reanalysed by FACS for their expression of F4/80. (b) TGFBI immunohistochemistry of MMTV-PyMT, MMTV-ErbB2, C(3)Tag, and 4T1 tumours. (c) Genotyping PCR of *Tgfbi*<sup>+/+</sup>, *Tgfbi*<sup>Δ/Δ</sup> and *Tgfbi*<sup>Δ/+</sup> mice. (d) Western blot for TGFBI and vinculin (loading control) for 3 MMTV-PyMT;*Tgfbi*<sup>+/+</sup> and 3 MMTV-PyMT;*Tgfbi*<sup>Δ/Δ</sup> tumours. (e) Representative TGFBI IHC of a MMTV-PyMT;*Tgfbi*<sup>+/+</sup> and a MMTV-PyMT;*Tgfbi*<sup>Δ/Δ</sup> tumour. (f) Representative AldeFluor analysis FACS analysis of MMTV-PyMT;*Tgfbi*<sup>+/+</sup> and MMTV-PyMT;*Tgfbi*<sup>Δ/Δ</sup> tumours. (g) MMTV-PyMT;*Tgfbi*<sup>+/+</sup> and MMTV-PyMT;*Tgfbi*<sup>Δ/Δ</sup> tumours were pulverised, their RNA was extracted, subjected to reverse transcription and analysed by qPCR for the expression of *Aldh1a3*. Data were analysed by unpaired t test (n=4 wt, n=5 ko). *Rplp0* was used as a housekeeping gene.

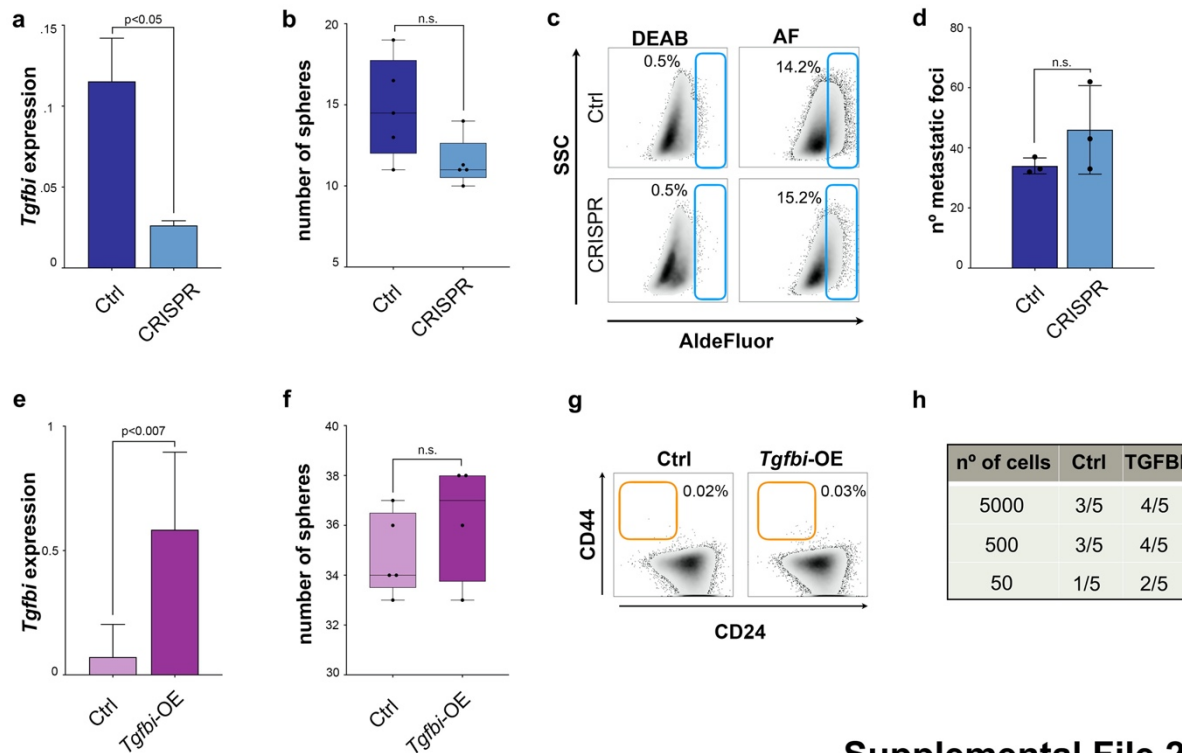

## Supplemental File 2

**Supplemental File 2:** (a) C(3)TAG cells were infected with lentiviruses containing a CRISPR-*Tgfb1*, cells were selected and tested for expression of *Tgfb1* by qPCR. Data were analysed by unpaired t test ( $n=2$ ). *Rplp0* was used as a housekeeping gene. (b) C(3)TAG cells wt or ko for TGFB1 were seeded as spheres ( $10^3$  cells/ well). Spheres were counted 10 days later. Data were analysed by unpaired t test ( $n = 5$  wt,  $n=5$  ko). (c) C(3)TAG cells wt or ko for TGFB1 were analysed by FACS using the AldeFluor assay. (d)  $5 \times 10^5$  C(3)TAG cells wt or ko for TGFB1 were injected into NSG mice via tail vein. Metastatic foci were counted 4 weeks later. Data were analysed by unpaired t test ( $n=3$ ). (e) *Tgfb1* qPCR in MDA-MB-453 cells infected with control or *Tgfb1* lentiviruses. *SNRPD3* was used as a housekeeping gene. (f) MDA-MB-453 cells overexpressing *Tgfb1* and their respective controls were seeded as spheres ( $10^3$  cells/ well). Spheres were counted 10 days later. Data were analysed by unpaired t test ( $n = 5$  wt,  $n=4$  *Tgfb1*-OE). (g) MDA-MB-453 cells overexpressing *Tgfb1* and their respective controls were analysed by FACS for the presence of  $CD24^{low}CD44^{high}$  cells. (h) MDA-MB-453 cells overexpressing *Tgfb1* and their respective controls were trypsinised, counted, and injected orthotopically in limiting dilution assays in NSG mice. The presence or absence of tumours was evaluated for a maximum of 3 months after injection. Data were analysed using ELDA ( $P=0.14$ ).

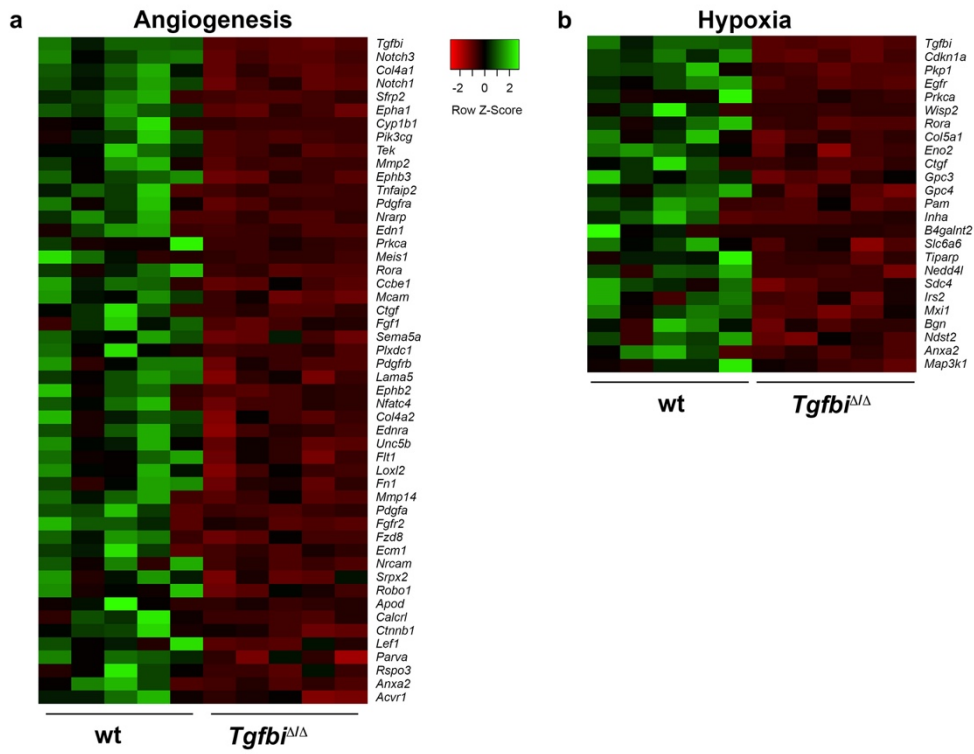

### Supplemental File 3

**Supplemental File 3:** Heatmaps of statistically significant changed genes from the enrichment score analyses showed in Figure 2a.

a

### Hypoxia

| ID    | Gene   | ENSMUSE             | transcript | log2FCChange | FCSE      | pvalue    | adj. p    |
|-------|--------|---------------------|------------|--------------|-----------|-----------|-----------|
| 7142  | Tgfb1  | ENSMUSE0000000189   | 548.56456  | -0.207141    | 1.165663  | 6.38E-07  | 1.18E-02  |
| 3808  | Ccl6l1 | ENSMUSE00000002367  | 4066.48474 | -1.2474683   | 6.1645155 | 4.67E-14  | 5.54E-12  |
| 5143  | Pgcl1  | ENSMUSE000000026413 | 964.102497 | -0.2204213   | 0.3700506 | 9.34E-12  | 8.40E-10  |
| 2408  | Egr1   | ENSMUSE00000002122  | 1574.00481 | -0.9319081   | 1.1702882 | 4.39E-08  | 1.87E-06  |
| 489   | Erm1   | ENSMUSE00000002141  | 103.711948 | -0.440081    | 0.1832677 | 0.0027148 | 0.0002768 |
| 1209  | Cp3    | ENSMUSE0000000563   | 136.14584  | -0.2430658   | 0.3458884 | 0.0028982 | 0.0005861 |
| 8040  | Rora   | ENSMUSE00000002238  | 596.122596 | -0.796702    | 1.1690147 | 4.79E-05  | 0.0008106 |
| 5498  | Ccl3a1 | ENSMUSE00000002867  | 2689.26322 | -1.4387068   | 3.3546619 | 5.08E-05  | 0.0008213 |
| 7138  | Id4    | ENSMUSE00000002098  | 2766.88209 | -0.8562999   | 2.4271206 | 0.0007412 | 0.0007629 |
| 6127  | Pgcn   | ENSMUSE00000001035  | 2929.76268 | -0.845212    | 2.2463561 | 0.0001614 | 0.0007624 |
| 8884  | Itih4  | ENSMUSE00000002968  | 32.783768  | -2.5130366   | 7.2881808 | 0.0005406 | 0.0008112 |
| 7827  | Cpca1  | ENSMUSE00000001119  | 1340.30031 | -0.583711    | 0.6199515 | 0.0002577 | 0.0008588 |
| 2136  | Cg1    | ENSMUSE00000001997  | 4602.86334 | -1.1732089   | 3.3119021 | 0.0014624 | 0.0003276 |
| 10223 | It2    | ENSMUSE00000001894  | 547.17702  | -1.2213883   | 1.3881706 | 0.0146098 | 0.0147239 |
| 17432 | Spx    | ENSMUSE00000000884  | 82.5006644 | -0.647111    | 0.2570284 | 0.0119029 | 0.0464110 |
| 7757  | Bgn    | ENSMUSE00000001375  | 2607.89812 | -0.684399    | 2.8281715 | 0.0024196 | 0.0167419 |
| 10681 | Nes2   | ENSMUSE00000001038  | 619.484446 | -0.821981    | 1.1833398 | 0.0026965 | 0.0110912 |
| 4285  | Hes6l1 | ENSMUSE00000001689  | 3654.40045 | -0.4400344   | 0.1412088 | 0.0111267 | 0.0001775 |
| 12358 | Phox2a | ENSMUSE00000000965  | 5394.53623 | -1.884082    | 4.4371244 | 1.12E-05  | 0.0004078 |
| 8307  | Anxa2  | ENSMUSE00000002021  | 16566.8611 | -0.1024655   | 0.2041007 | 0.0087756 | 0.0468941 |
| 1681  | Scl4   | ENSMUSE00000001709  | 13748.7755 | -0.4454027   | 0.1407289 | 0.0115049 | 0.0141143 |
| 1742  | Bcl6l1 | ENSMUSE00000001493  | 3886.56161 | -0.5166981   | 0.2981848 | 0.0107271 | 0.0141229 |
| 2637  | Hes9   | ENSMUSE00000001709  | 1029.32869 | -1.0486852   | 3.5149723 | 0.0043348 | 0.0001930 |
| 1407  | Slc11  | ENSMUSE000000014813 | 302.74281  | -0.0826654   | 0.2396127 | 0.0104843 | 0.0008363 |
| 3047  | Mmp14  | ENSMUSE00000002174  | 2735.46268 | -0.8713233   | 2.2332003 | 0.0079239 | 0.0048774 |
| 13379 | Hes14  | ENSMUSE00000001919  | 2357.81948 | -0.440081    | 0.1832677 | 0.0027148 | 0.0002768 |
| 9039  | Tgfb1  | ENSMUSE00000002374  | 805.58474  | -0.4743691   | 1.165663  | 0.0027489 | 0.0127224 |
| 8144  | Ets1   | ENSMUSE00000002035  | 1002.64603 | -0.738877    | 1.2813358 | 0.0006055 | 0.0104108 |
| 14523 | Chem3  | ENSMUSE00000007337  | 23.8901137 | -1.0488151   | 4.8817839 | 0.0038229 | 0.118496  |
| 4929  | Erm3   | ENSMUSE00000002929  | 23.1918305 | -0.7192926   | 0.4503736 | 0.0791924 | 0.2001976 |
| 14251 | Bcl2   | ENSMUSE00000001729  | 1029.32869 | -0.738877    | 1.2813358 | 0.0006055 | 0.0104108 |
| 4145  | Dna    | ENSMUSE00000002452  | 282.40746  | -0.4285446   | 0.2181868 | 0.0111502 | 0.1772614 |
| 722   | Pgf    | ENSMUSE000000004791 | 2386.89202 | -0.709986    | 1.3995449 | 0.0043487 | 0.1909022 |
| 4783  | Gat1   | ENSMUSE00000002579  | 6442.16577 | -0.889884    | 2.9295114 | 0.0147893 | 0.0758874 |
| 4621  | Bcl1   | ENSMUSE00000001763  | 829.87622  | -0.4743691   | 1.165663  | 0.0027489 | 0.0127224 |
| 3101  | Bqsmc2 | ENSMUSE00000001318  | 164.202488 | -0.5488881   | 0.2298799 | 0.0007827 | 0.0054802 |
| 2105  | Don    | ENSMUSE00000001989  | 1739.41028 | -0.6234195   | 0.8827698 | 0.0052028 | 0.1703263 |
| 6081  | F3     | ENSMUSE00000002128  | 3386.47358 | -0.845212    | 2.2463561 | 0.0001614 | 0.0007624 |
| 4112  | Maf1   | ENSMUSE00000002025  | 1703.18827 | -0.4002939   | 0.1761763 | 0.0028431 | 0.0170025 |
| 9468  | Irf3   | ENSMUSE00000003847  | 1043.14086 | -0.5488881   | 0.2298799 | 0.0007827 | 0.1703263 |
| 808   | Hmcr1  | ENSMUSE00000005413  | 1105.82214 | -0.4002939   | 0.1761763 | 0.0028431 | 0.0170025 |
| 9645  | Phc2b1 | ENSMUSE00000001780  | 995.490423 | -0.6938833   | 0.2346373 | 0.0749521 | 0.2031994 |
| 495   | Hes1   | ENSMUSE00000002241  | 2.9219166  | -0.845212    | 2.2463561 | 0.0001614 | 0.0007624 |
| 5005  | Ahr1   | ENSMUSE00000002819  | 597.542123 | -0.9308813   | 1.2243001 | 0.0019431 | 0.0240819 |
| 8933  | Cp1    | ENSMUSE00000003429  | 812.18274  | -0.5132855   | 0.2607761 | 0.0009994 | 0.0205051 |
| 2805  | Tgfb1  | ENSMUSE00000002123  | 691.1757   | -0.387857    | 0.1517949 | 0.0419453 | 0.1932426 |

b

### Angiogenesis

| ID    | Gene    | ENSMUSE             | transcript | log2FCChange | FCSE      | pvalue    | adj. p    |
|-------|---------|---------------------|------------|--------------|-----------|-----------|-----------|
| 8713  | Tgfb1   | ENSMUSE0000000189   | 548.56456  | -0.207141    | 1.165663  | 6.38E-07  | 1.18E-02  |
| 10218 | Nes2    | ENSMUSE00000001038  | 2003.2157  | -1.787255    | 3.0504572 | 8.17E-18  | 1.92E-15  |
| 5451  | Nes1    | ENSMUSE00000002803  | 3725.2157  | -1.21517     | 0.1870006 | 5.67E-10  | 3.46E-08  |
| 7825  | Ccl4a1  | ENSMUSE00000003102  | 11789.209  | -1.22019     | 0.2180779 | 3.08E-10  | 2.42E-08  |
| 7013  | Pgcl1   | ENSMUSE000000026413 | 964.102497 | -0.2204213   | 0.3700506 | 9.34E-12  | 8.40E-10  |
| 890   | Erm3    | ENSMUSE00000002929  | 1764.01919 | -0.85047     | 1.1725043 | 8.29E-07  | 2.44E-05  |
| 961   | It2     | ENSMUSE00000000838  | 106.36987  | -1.89802     | 0.3131849 | 3.81E-07  | 1.26E-05  |
| 5999  | Spc2    | ENSMUSE00000002799  | 893.19875  | -2.84981     | 0.4862287 | 1.39E-09  | 8.35E-08  |
| 2455  | Pdgfra  | ENSMUSE00000001979  | 185.02079  | -1.24827     | 0.2412717 | 2.71E-07  | 9.37E-06  |
| 7892  | Erm6    | ENSMUSE00000001916  | 582.54241  | -0.76271     | 0.2246828 | 0.0007264 | 0.0004508 |
| 7960  | Mmp2    | ENSMUSE000000031740 | 1987.2498  | -1.48137     | 0.2981919 | 7.80E-07  | 2.37E-05  |
| 6716  | Pdgfra  | ENSMUSE00000002821  | 336.87634  | -1.58387     | 0.3001401 | 6.13E-06  | 0.00139   |
| 8204  | Miam    | ENSMUSE00000003136  | 1873.6319  | -0.70703     | 0.1702923 | 7.02E-05  | 0.001203  |
| 3363  | Smedd1  | ENSMUSE00000002231  | 207.8881   | -1.11093     | 0.250426  | 0.0010265 | 0.0024884 |
| 12462 | Ccl6l1  | ENSMUSE00000004618  | 173.90699  | -1.87076     | 0.408917  | 4.80E-05  | 0.0008294 |
| 6949  | F11     | ENSMUSE00000002968  | 368.88412  | -0.78885     | 0.2283581 | 0.0005983 | 0.0002356 |
| 8240  | Nes1    | ENSMUSE00000003208  | 1968.12259 | -0.796702    | 1.1690151 | 4.79E-05  | 0.0008106 |
| 8783  | Foxl1   | ENSMUSE00000000894  | 180.89369  | -0.28877     | 0.2612021 | 0.0012969 | 0.0117171 |
| 7828  | Ccl4a2  | ENSMUSE00000001503  | 3365.3862  | -0.83544     | 0.2351008 | 0.000861  | 0.0040401 |
| 16610 | Nwap    | ENSMUSE00000002022  | 800.87448  | -2.16658     | 0.5021007 | 1.98E-05  | 0.000136  |
| 3875  | Mafk4   | ENSMUSE00000002411  | 145.1885   | -1.16546     | 0.3326998 | 0.000173  | 0.0003884 |
| 4029  | Foxl1   | ENSMUSE00000001417  | 189.71709  | -0.28877     | 0.2612021 | 0.0012969 | 0.0117171 |
| 6374  | Erm3    | ENSMUSE00000002929  | 1764.01919 | -1.24827     | 0.2412717 | 2.71E-07  | 9.37E-06  |
| 2183  | Unc5b1  | ENSMUSE00000002009  | 773.74185  | -0.72018     | 0.200808  | 0.0008101 | 0.00119   |
| 8945  | Lmo2    | ENSMUSE00000003205  | 589.43788  | -0.88289     | 0.2864726 | 0.000561  | 0.0047985 |
| 11719 | Hes1    | ENSMUSE00000002025  | 1703.18827 | -0.4002939   | 0.1761763 | 0.0028431 | 0.0170025 |
| 9652  | Fgl1    | ENSMUSE00000002585  | 86.47403   | -1.08325     | 0.822379  | 0.0001811 | 0.002448  |
| 5051  | F11     | ENSMUSE00000002819  | 4798.7017  | -1.18176     | 0.2445403 | 0.0006083 | 0.0005683 |
| 1160  | Mmp14   | ENSMUSE00000002174  | 4793.2027  | -1.02748     | 0.301246  | 0.000647  | 0.008741  |
| 4072  | Hgfa    | ENSMUSE00000002958  | 235.03519  | -0.84487     | 0.2401795 | 0.010967  | 0.0030909 |
| 2138  | Ccl4a1  | ENSMUSE00000002982  | 2142.6208  | -1.17522     | 0.2180779 | 0.001267  | 0.0004988 |
| 7528  | Fgfr2   | ENSMUSE00000003049  | 148.85927  | -1.38023     | 0.4821975 | 0.0011785 | 0.0110086 |
| 4028  | Cyp11a1 | ENSMUSE000000024087 | 704.83821  | -0.68926     | 0.820291  | 1.11E-07  | 4.29E-06  |
| 7996  | Spry2   | ENSMUSE00000001253  | 190.46627  | -0.87422     | 0.29703   | 0.003394  | 0.026295  |
| 2289  | Mmp1    | ENSMUSE00000001985  | 102.86989  | -0.36087     | 0.182691  | 0.001268  | 0.0117171 |
| 5407  | Acor1   | ENSMUSE00000002838  | 505.98813  | -0.31179     | 0.1817286 | 0.0007608 | 0.0008767 |
| 4673  | Mmp19   | ENSMUSE00000002173  | 170.02817  | -0.60225     | 0.287698  | 0.010171  | 0.007223  |
| 6071  | Emr1    | ENSMUSE00000002108  | 869.17402  | -1.29413     | 0.461499  | 0.001267  | 0.0120127 |
| 9139  | Mmp1    | ENSMUSE00000001985  | 102.86989  | -0.36087     | 0.182691  | 0.001268  | 0.0117171 |
| 7484  | Par1    | ENSMUSE00000003070  | 4293.7347  | -0.75019     | 0.1714348 | 0.0008215 | 0.0082582 |
| 16628 | Canal   | ENSMUSE00000002958  | 146.39819  | -0.70918     | 0.252427  | 0.0004845 | 0.0037818 |
| 13366 | Phox2a  | ENSMUSE00000000965  | 5394.53623 | -1.884082    | 4.4371244 | 1.12E-05  | 0.0004078 |
| 989   | Hes1    | ENSMUSE00000002241  | 2.9219166  | -0.845212    | 2.2463561 | 0.0001614 | 0.0007624 |
| 3708  | Nes1    | ENSMUSE00000002819  | 302.14933  | -1.89801     | 0.3792989 | 0.0006867 | 0.003781  |
| 8217  | Ahr1    | ENSMUSE00000003231  | 1668.865   | -0.62446     | 0.2041021 | 0.0007786 | 0.048984  |
| 18133 | Vsmg1   | ENSMUSE00000002848  | 1738.5872  | -0.86276     | 0.1871298 | 0.001338  | 0.0076582 |
| 7123  | Bcl2    | ENSMUSE00000001729  | 1029.32869 | -0.738877    | 1.2813358 | 0.0006055 | 0.0104108 |
| 5543  | Bcl1a2  | ENSMUSE00000001130  | 513.40783  | -0.59702     | 0.243801  | 0.0217482 | 0.09225   |
| 10689 | Tgfb1   | ENSMUSE00000002374  | 1420.3917  | -0.4743691   | 1.165663  | 0.0027489 | 0.0127224 |
| 11372 | Mmp2    | ENSMUSE00000001445  | 238.19501  | -0.45811     | 0.2112416 | 0.000808  | 0.103327  |
| 8144  | Ets1    | ENSMUSE00000002035  | 1002.64603 | -0.738877    | 1.2813358 | 0.0006055 | 0.0104108 |
| 14627 | Bcl3a3  | ENSMUSE00000001439  | 385.45446  | -0.40781     | 0.1633201 | 0.0137779 | 0.07205   |
| 83    | Acor1   | ENSMUSE00000000030  | 908.89099  | -0.46572     | 0.2304265 | 0.045121  | 0.161203  |
| 2087  | Hmcr1   | ENSMUSE00000001989  | 186.195027 | -1.19905     | 0.4398449 | 0.0008226 | 0.011713  |
| 8029  | Ccl13   | ENSMUSE00000001841  | 162.4403   | -0.72988     | 0.2400075 | 0.192141  | 0.0078278 |
| 12113 | Scl2    | ENSMUSE00000004791  | 1871.9007  | -0.54782     | 0.2217287 | 0.0016287 | 0.0021885 |
| 13695 | Lmo15   | ENSMUSE00000002873  | 1733.7802  | -0.89245     | 0.300827  | 0.064438  | 0.000182  |
| 7928  | Pgf     | ENSMUSE000000004791 | 2386.89202 | -0.709986    | 1.3995449 | 0.0043487 | 0.1909022 |
| 7389  | Mmp2    | ENSMUSE00000002605  | 6487.209   | -1.28843     | 0.5432607 | 0.001848  | 0.0018144 |
| 989   | Spc2    | ENSMUSE00000002799  | 893.19875  | -2.84981     | 0.4862287 | 0.0012969 | 0.0004508 |
| 7981  | Ccl3l1  | ENSMUSE00000001778  | 3891.3841  | -0.80255     | 0.228275  | 0.0004675 | 0.1989035 |
| 3123  | F11     | ENSMUSE00000002819  | 173.13655  | -0.55159     | 0.2534584 | 0.0008084 | 0.1215044 |
| 9917  | Cv2d    | ENSMUSE00000003729  | 144.48927  | -0.72096     | 0.3344861 | 0.0042255 | 0.190903  |
| 8144  | Ets1    | ENSMUSE00000002035  | 1002.64603 | -0.738877    | 1.2813358 | 0.0006055 | 0.0104108 |
| 3051  | Apor1   |                     |            |              |           |           |           |

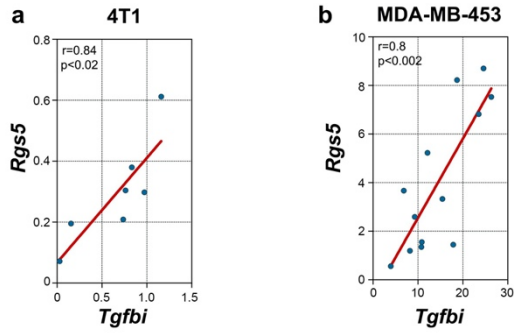

## Supplemental File 5

**Supplemental File 5:** Correlation analyses of *Rgs5* and *Tgfb1* transcripts in 4T1 (n=7) and MDA-MB-453 (n=13) tumours. Tumours were pulverised, their RNA was extracted, subjected to reverse transcription, and analysed by qPCR for the expression of *Rgs5* and *Tgfb1*. *Rplp0* was used as a housekeeping gene for mouse and *SNRPD3* for human.



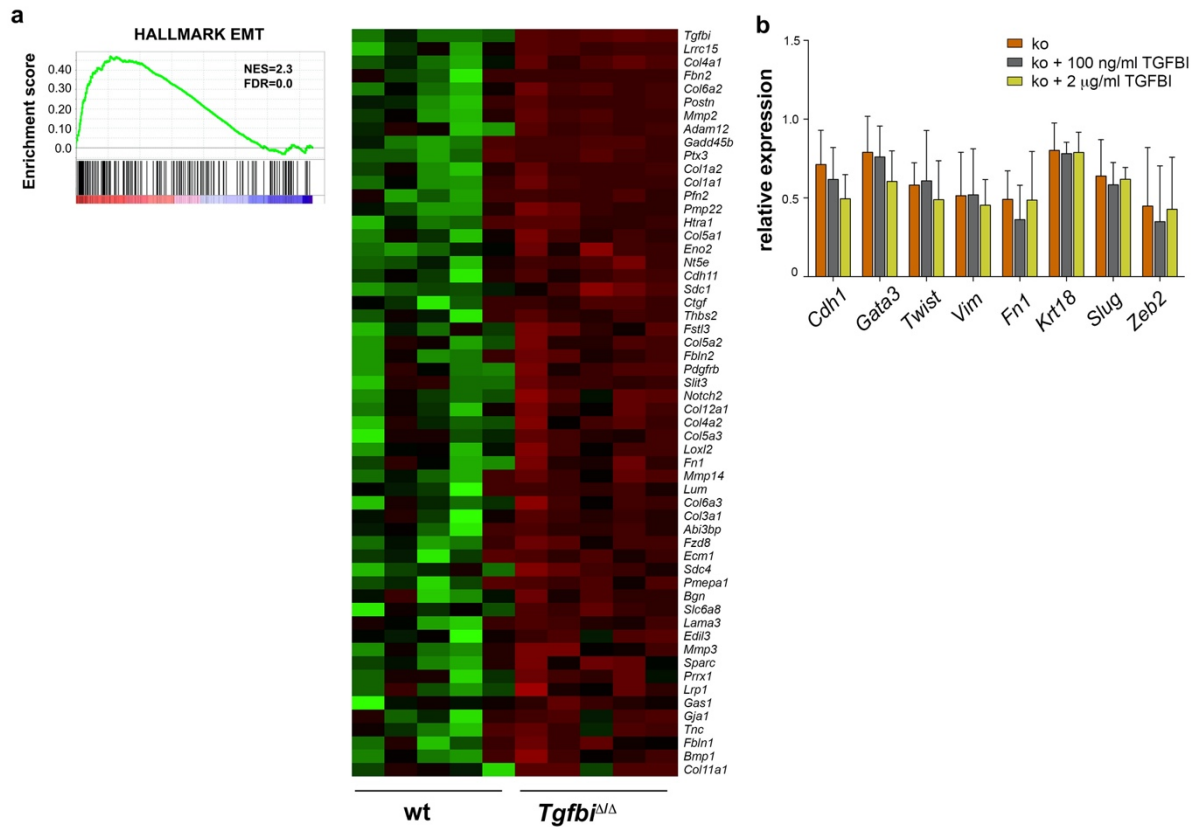

## Supplemental File 6

**Supplemental File 6:** (a) Enrichment score analysis of MMTV-PyMT;*Tgfb1*<sup>+/+</sup> and MMTV-PyMT;*Tgfb1*<sup>ΔΔ</sup> tumours for Hallmark EMT (n=5) and heatmap of statistically significant changed genes. (b) qPCR of MMTV-PyMT;*Tgfb1*<sup>ΔΔ</sup> tumour cells grown with either 100 ng/ml or 2 μg/ml exogenous TGFBI. Data were analysed using one-way ANOVA, and are presented as mean and SD (n=5). *Rplp0* was used as a housekeeping gene.

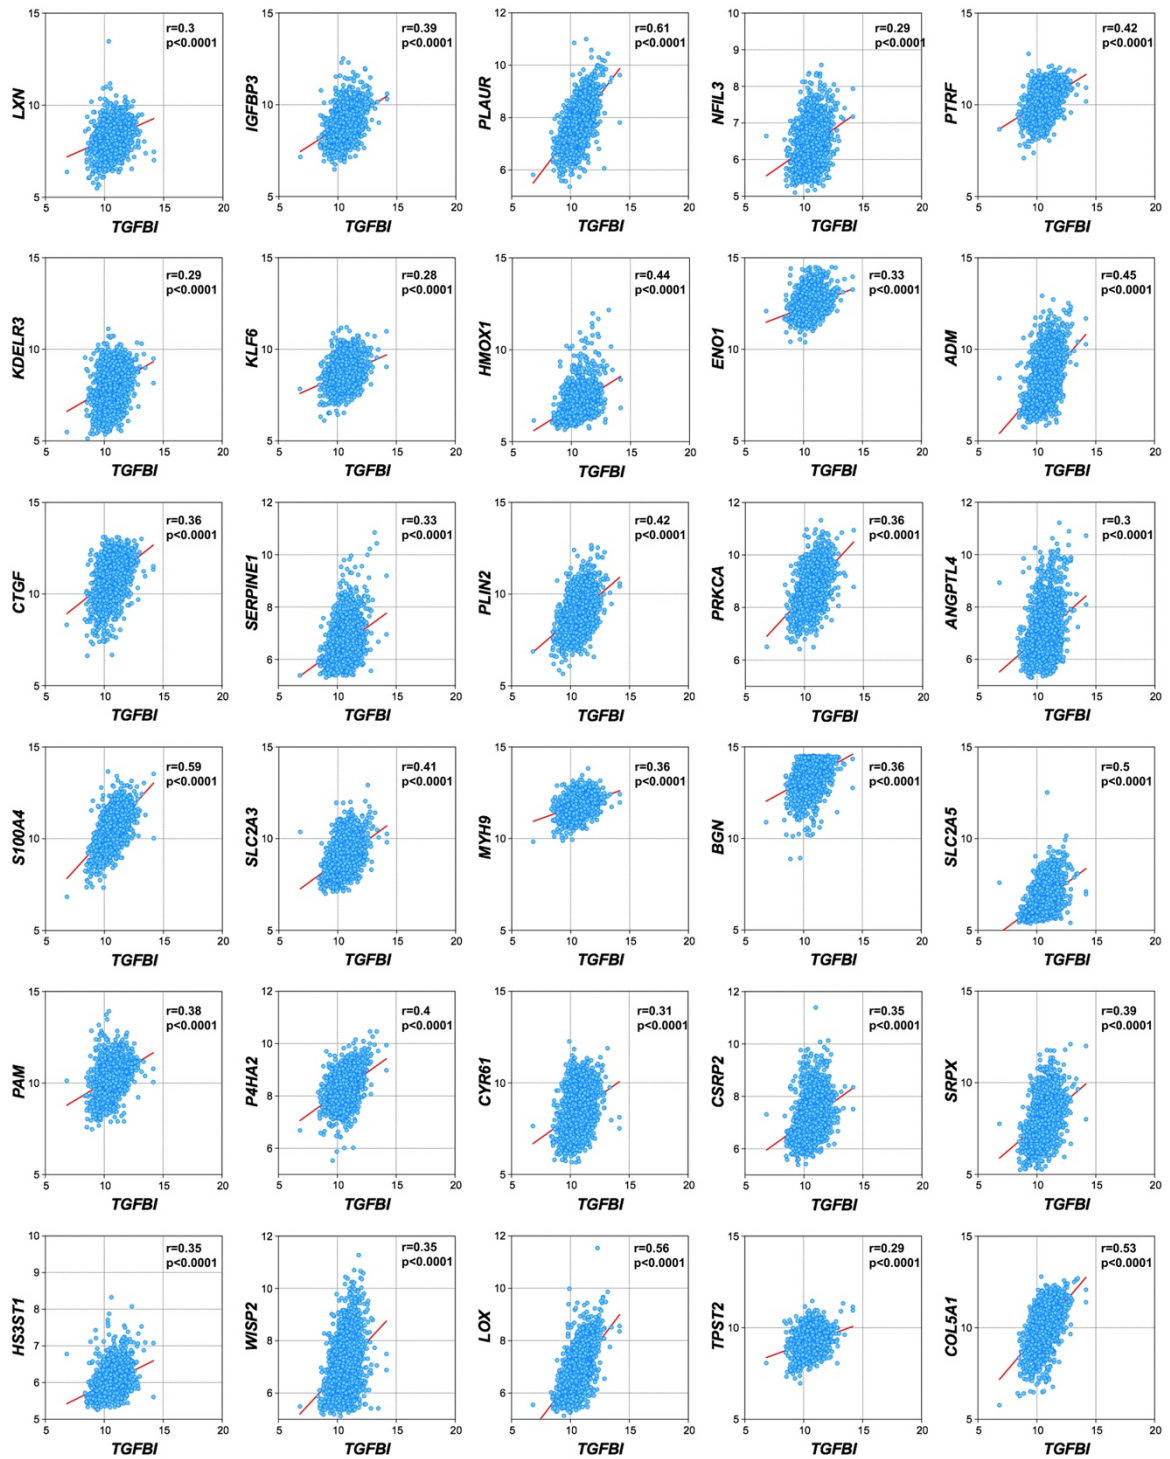

## Supplemental File 7

Supplemental File 7: Spearman's correlation of hypoxia-related genes with *TGFBI* in the METABRIC cohort.

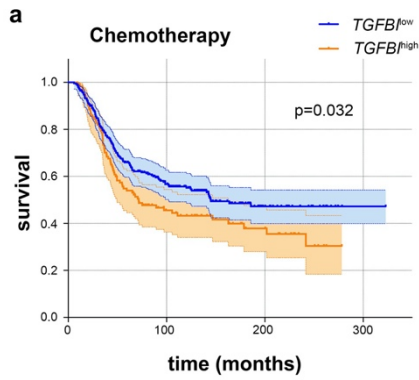

## Supplemental File 8

**Supplemental File 8:** Survival curves of breast cancer patients in the METABRIC cohort who received chemotherapy classified according to the expression of *TGFBI*. Patients were stratified using the application *Evaluate cutpoints*, and the survival curves were compared using the Log-rank (Mantel-Cox) test ( $n_{high}=123$ ,  $n_{low}=250$ ).

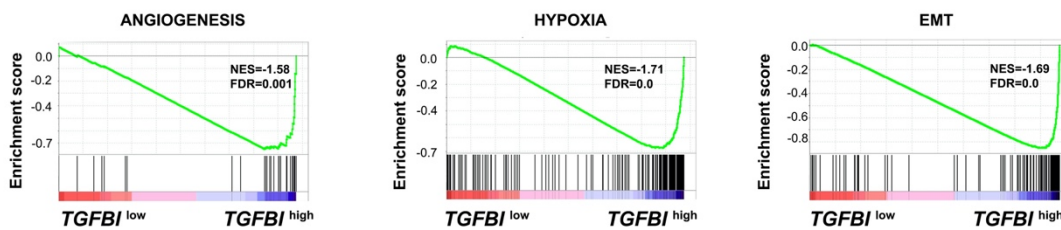

## Supplemental File 9

**Supplemental File 9:** Enrichment score analyses of  $TGFBI^{low}$  (<75th percentile) and  $TGFBI^{high}$  ( $\geq 75$ th percentile) tumours in the METABRIC



**Supplemental File 10. Table 1: Primer Sets Used in This Study.**

| <b>ID</b>      | <b>Forward 5'-3'</b>   | <b>Reverse 5'-3'</b>   |
|----------------|------------------------|------------------------|
| <i>Rplp0</i>   | GATTCGGGATATGCTGTTGG   | GTTCTGAGCTGGCACAGTGA   |
| <i>Krt18</i>   | CGAGGCACTCAAGGAAGAAC   | AATCTGGGCTTCCAGACCTT   |
| <i>Aldh1a3</i> | GAGCGATCCTGGCTACTCTG   | GACGAAAAAGGCATGAAGGA   |
| <i>Tgfb1</i>   | ATCACCAACAACATCCAGCA   | CCAGCACGGTATTGAGTCCT   |
| <i>TGFBI</i>   | AAGTCTCTCCAAGGTGACAAGC | CCTTGTTGACACTCACCACATT |
| <i>SNRPD3</i>  | GCCCAGATTGTGAAGGACAT   | TCAGCTCAGCACGGTAGTTG   |
| <i>Gata3</i>   | GCTACGGTGCAGAGGTATCC   | AGAGATCCGTGCAGCAGAG    |
| <i>Mmp2</i>    | ACACTGGGACCTGTCACTCC   | TGTCACTGTCCGCCAAATAA   |
| <i>Mmp9</i>    | CCAGATGATGGGAGAGAAGC   | TTGAGGCCTTTGAAGGTTTG   |
| <i>Snai2</i>   | GAACCCACACATTGCCTTGT   | GCAGAAGCGACATTCTGGAG   |
| <i>Zeb2</i>    | CTATTCCCCTGCATCAGCAT   | GGCTTGTCAGTCCTTTCTCG   |
| <i>Vim</i>     | GCGAGGAGAGCAGGATTTCTC  | GGGTGTCAACCAGAGGAAGT   |
| <i>Fn1</i>     | TGCACGTGTGTGGGGAACGG   | CCCGGCCCTGACCAAAGCAG   |
| <i>Rgs5</i>    | AGACGGTTCCACCAGGTTC    | CAGACAGAGGCCCTAAAGA    |
| <i>Hif1a</i>   | CAGTCGACACAGCCTCGATA   | CGGCTCATAACCCATCAACT   |
